# Supplementary material
Source: Springer Nature journal article supplement (https://www.springermedizin.de/resource/supplementary/13049_2009_153_MOESM1_ESM.pdf/9665990)

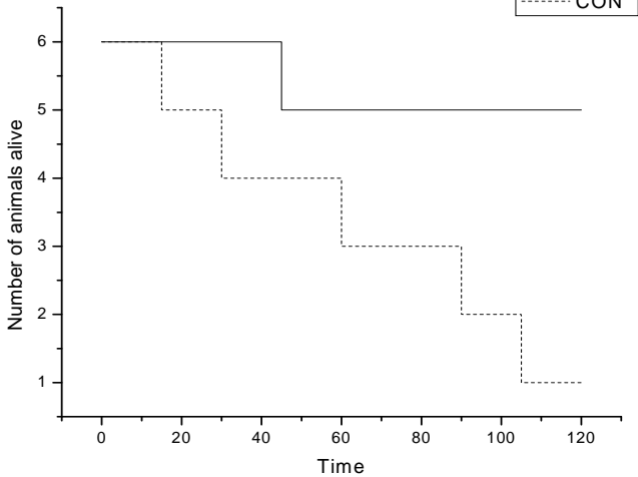

Supplement: MOESM1 [file 9665990]
